# Supplementary material for: Statistical characterization of urban CO2 emission signals observed by commercial airliner measurements
Source: PubMed Central journal article supplement (PMC7224273; doi:10.1038/s41598-020-64769-9), 2020-05-14
Supplement: 41598_2020_64769_MOESM1_ESM.pdf [file 41598_2020_64769_MOESM1_ESM.pdf]

*Supplementary material*

**Statistical characterization of urban CO<sub>2</sub> emission signals observed by commercial airliner measurements**

Taku Umezawa<sup>1,\*</sup>, Hidekazu Matsueda<sup>2</sup>, Tomohiro Oda<sup>3,4</sup>, Kaz Higuchi<sup>5</sup>, Yousuke Sawa<sup>2,6</sup>, Toshinobu Machida<sup>1</sup>, Yosuke Niwa<sup>1,2</sup>, and Shamil Maksyutov<sup>1</sup>

<sup>1</sup>National Institute for Environmental Studies, Tsukuba, Japan.

<sup>2</sup>Meteorological Research Institute, Tsukuba, Japan.

<sup>3</sup>Global Modeling and Assimilation Office, NASA Goddard Space Flight Center, Greenbelt, USA

<sup>4</sup>Goddard Earth Sciences Technology and Research, Universities Space Research Association, Columbia, MD, USA.

<sup>5</sup>Faculty of Environmental Studies, York University, Toronto, Canada.

<sup>6</sup>Japan Meteorological Agency, Tokyo, Japan

\*Corresponding Author ([umezawa.taku@nies.go.jp](mailto:umezawa.taku@nies.go.jp))

**Supplementary Table S1. List of the airports of the CONTRAIL CO<sub>2</sub> measurements.**

The column vertical profile shows number of vertical profiles taken over each airport. Flight time is local time. City name is that representative for each airport. Population estimate of each city for 2010 is taken from United Nations [2015]<sup>11</sup>. City CO<sub>2</sub> emission was calculated based on the ODIAC dataset<sup>26,27</sup>.

| Airport code | Latitude (°N) | Longitude (°E) | Elevation (m) | Vertical profile | Flight time (Local Time) | City             | Population (thousands) | CO <sub>2</sub> emission (tC yr <sup>-1</sup> ) |
|--------------|---------------|----------------|---------------|------------------|--------------------------|------------------|------------------------|-------------------------------------------------|
| DME          | 55.409        | 37.906         | 179           | 374              | 15–20                    | Moscow           | 11461                  | 29152105                                        |
| AMS          | 52.309        | 4.764          | 3             | 226              | 14–22                    | Amsterda<br>m    | 1057                   | 12408689                                        |
| LHR          | 51.477        | –0.461         | 24            | 264              | 13–24                    | London           | 9699                   | 11864461                                        |
| YVR          | 49.194        | –123.184       | 4             | 431              | 7–16                     | Vancouver        | 2278                   | 2902291                                         |
| CDG          | 49.010        | 2.549          | 119           | 661              | 4–24                     | Paris            | 10460                  | 10697964                                        |
| MXP          | 45.631        | 8.728          | 24            | 88               | 17–23                    | Milano           | 3056                   | 10779381                                        |
| CTS          | 42.775        | 141.692        | 25            | 52               | 7–22                     | Sapporo          | 2591                   | 10584493                                        |
| BOS          | 42.363        | –71.006        | 6             | 83               | 9–19                     | Boston           | 4185                   | 10354860                                        |
| ORD          | 41.979        | –87.905        | 205           | 111              | 6–13                     | Chicago          | 8616                   | 16989467                                        |
| FCO          | 41.804        | 12.251         | 5             | 65               | 17–23                    | Rome             | 3592                   | 4209181                                         |
| JFK          | 40.640        | –73.779        | 4             | 118              | 8–14                     | New York         | 18365                  | 23290456                                        |
| PEK          | 40.080        | 116.585        | 35            | 78               | 8–22                     | Beijing          | 16190                  | 49682835                                        |
| SFO          | 37.619        | –122.375       | 4             | 378              | 0–3, 15–16               | San<br>Francisco | 3283                   | 5369921                                         |
| ICN          | 37.469        | 126.450        | 7             | 191              | 8–22                     | Incheon          | 2559                   | 42521466                                        |
| NRT          | 35.764        | 140.392        | 43            | 7692             | 6–23                     | Tokyo            | 36834                  | 46603586                                        |
| HND          | 35.553        | 139.781        | 6             | 4462             | 0–24                     | Tokyo            | 36834                  | 46603586                                        |
| NGO          | 34.858        | 136.805        | 5             | 999              | 5–23                     | Nagoya           | 9165                   | 33924321                                        |
| ITM          | 34.785        | 135.438        | 12            | 202              | 8–21                     | Osaka            | 19492                  | 27447862                                        |
| KIX          | 34.427        | 135.244        | 0             | 824              | 7–24                     | Osaka            | 19492                  | 27447862                                        |
| LAX          | 33.943        | –118.408       | 38            | 120              | 8–15                     | Los Angeles      | 12160                  | 23455740                                        |
| FUK          | 33.584        | 130.452        | 9             | 195              | 7–23                     | Fukuoka          | 5556                   | 8057204                                         |
| SAN          | 32.734        | –117.190       | 5             | 54               | 9–14                     | San Diego        | 2964                   | 6715360                                         |
| SHA          | 31.198        | 121.339        | 3             | 332              | 9–14                     | Shanghai         | 19980                  | 62338484                                        |
| DEL          | 28.566        | 77.103         | 237           | 739              | 16–24                    | Delhi            | 21935                  | 24677421                                        |
| TPE          | 25.078        | 121.233        | 32            | 124              | 9–23                     | Taipei           | 2654                   | 17403375                                        |
| HKG          | 22.309        | 113.915        | 6             | 812              | 8–17, 9–24               | Hong Kong        | 7050                   | 36701090                                        |
| HNL          | 21.319        | –157.922       | 4             | 2095             | 6–14                     | Honolulu         | 805                    | 2866534                                         |
| MEX          | 19.436        | –99.072        | 2230          | 55               | 9–12,<br>16–18           | Mexico<br>City   | 20132                  | 14557348                                        |
| MNL          | 14.509        | 121.019        | 23            | 78               | 9–16, 21–24              | Manila           | 11891                  | 4942616                                         |
| BKK          | 13.681        | 100.747        | 2             | 1670             | 0–24                     | Bangkok          | 8213                   | 18910974                                        |
| GUM          | 13.483        | 144.796        | 91            | 66               | 10–15,<br>21–27          | Guam             | 143                    | 1049821                                         |
| SIN          | 1.350         | 103.994        | 7             | 930              | 8–10, 16–19,<br>22–25    | Singapore        | 5079                   | 27456795                                        |
| CGK          | –6.126        | 106.656        | 10            | 493              | 16–18,<br>21–24          | Jakarta          | 9630                   | 16197473                                        |
| DPS          | –8.748        | 115.168        | 4             | 66               | 21–26                    | Denpasar         | 797                    | 2463670                                         |
| BNE          | –27.384       | 153.118        | 4             | 96               | 6–11                     | Brisbane         | 2034                   | 6893168                                         |
| SYD          | –33.946       | 151.177        | 6             | 1568             | 5–11                     | Sydney           | 4364                   | 6126149                                         |

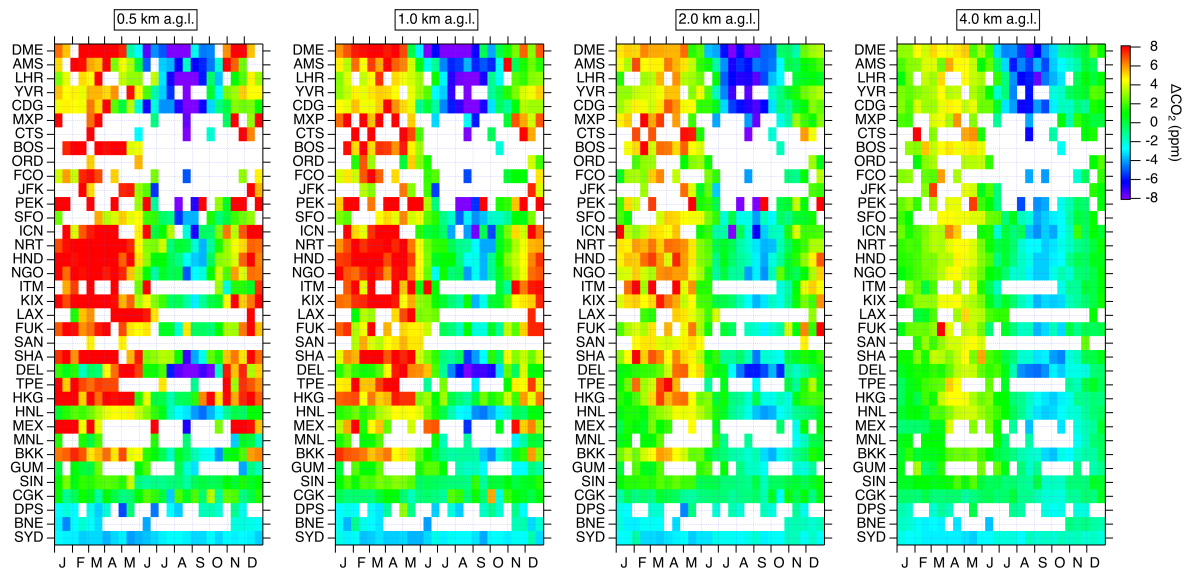

**Supplementary Figure S1. Seasonal climatology of  $\Delta\text{CO}_2$  (median) at different altitude bins (above ground level, a.g.l.) over different airports. See Supplementary Table S1 for airport codes.**

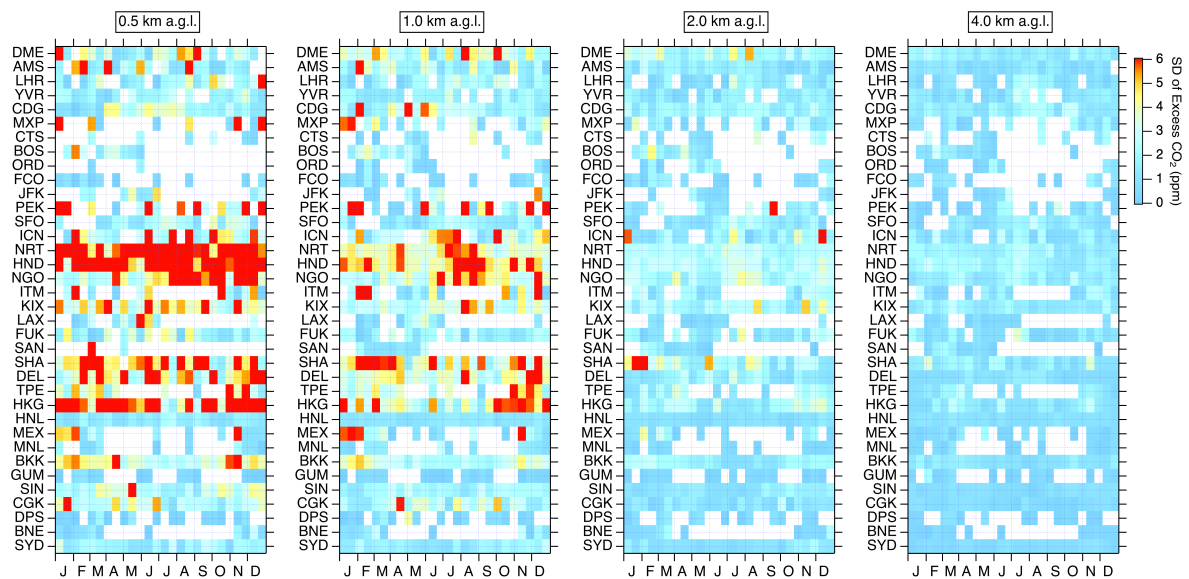

**Supplementary Figure S2. Seasonal climatology of standard deviation (SD) of excess  $\text{CO}_2$  at different altitude bins over different airports. See Supplementary Table 1 for airport codes.**

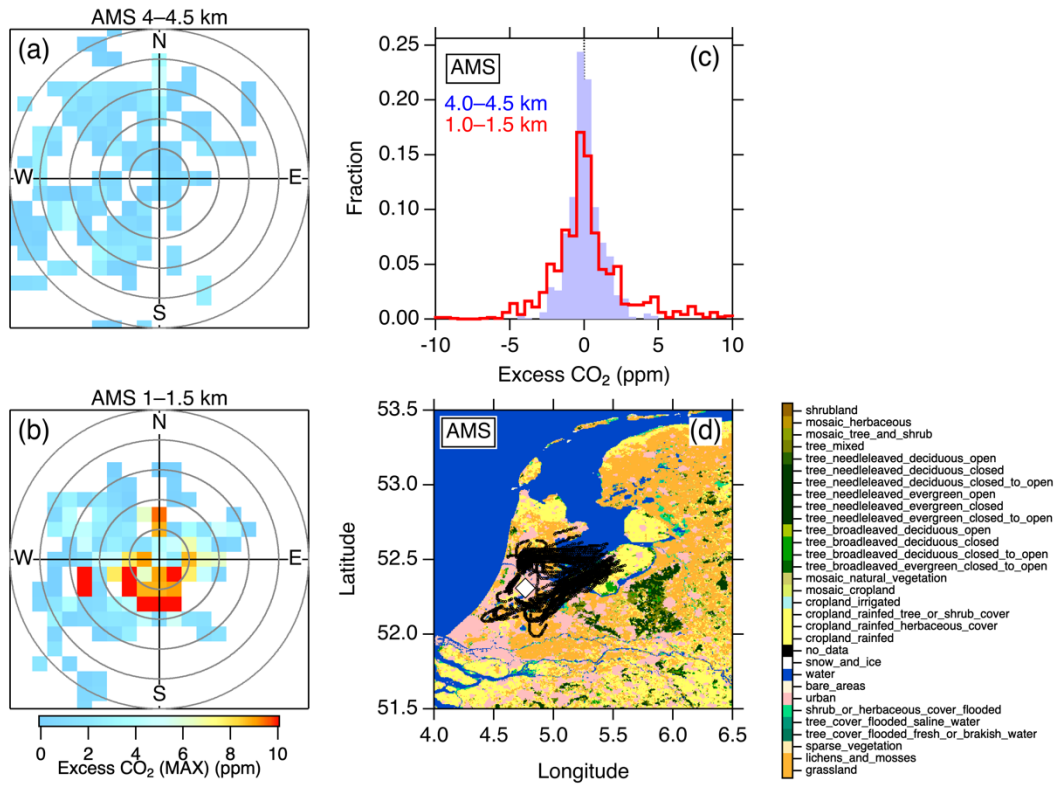

Supplementary Figure S3. Same as Fig. 1, but for Amsterdam Airport Schiphol (AMS).

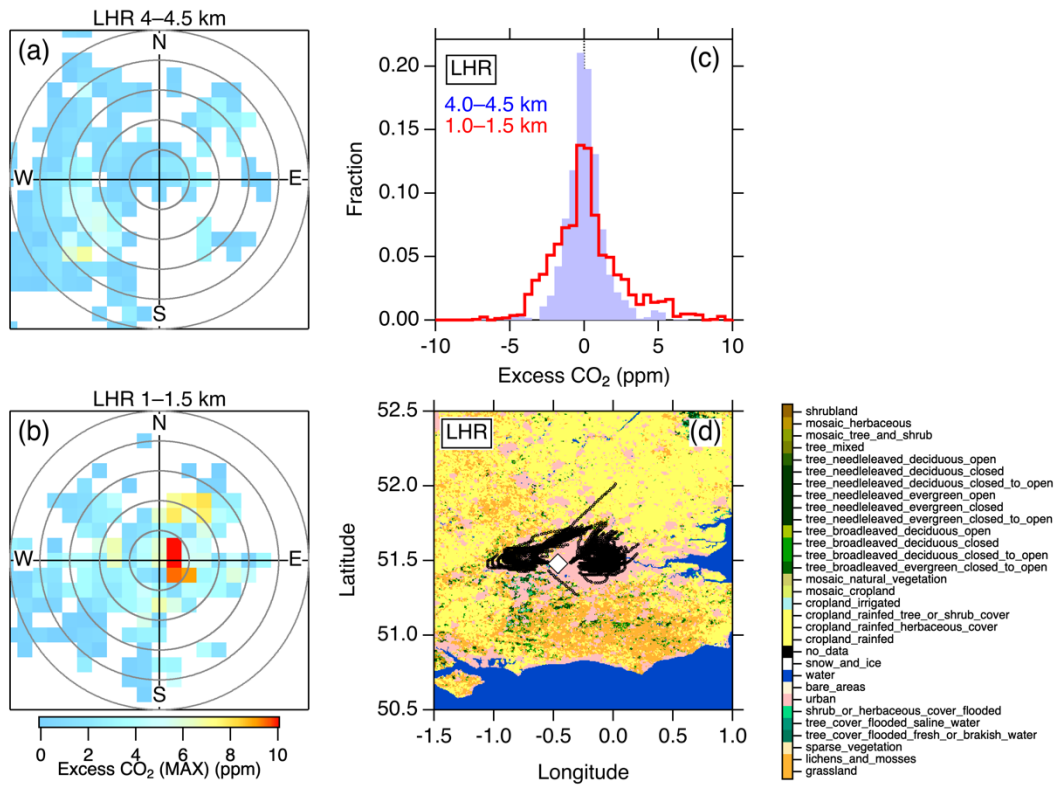

Supplementary Figure S4. Same as Fig. 1, but for London Heathrow Airport (LHR).

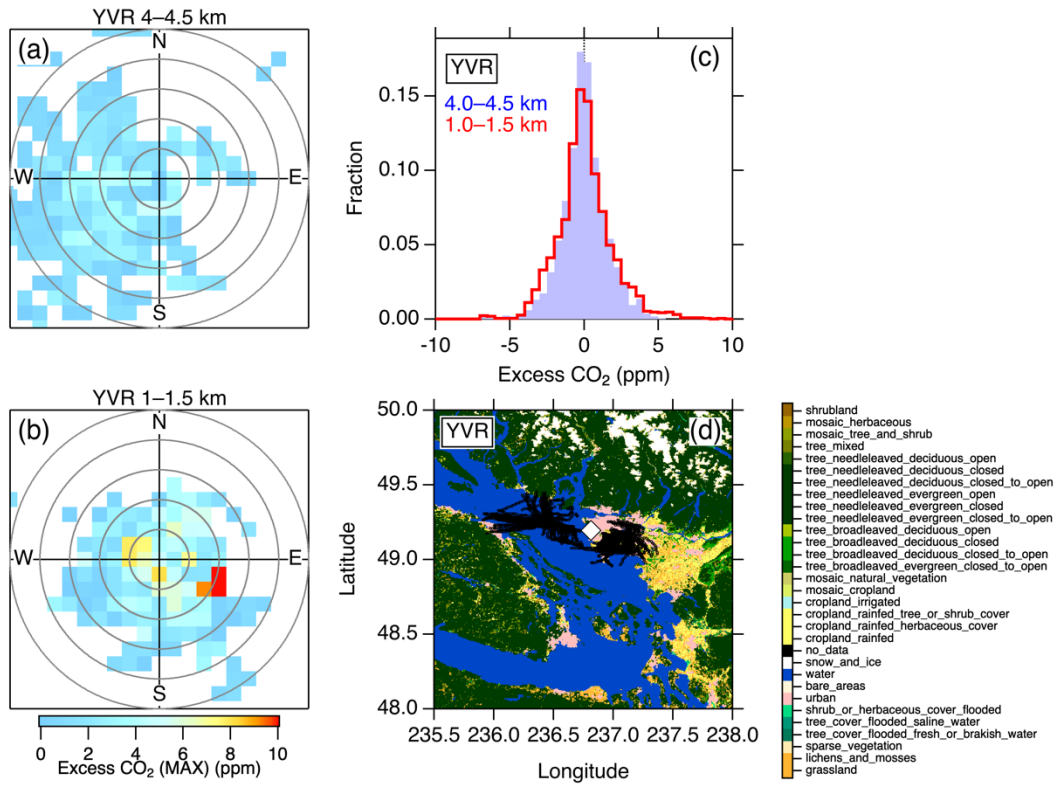

Supplementary Figure S5. Same as Fig. 1, but for Vancouver International Airport (YVR).

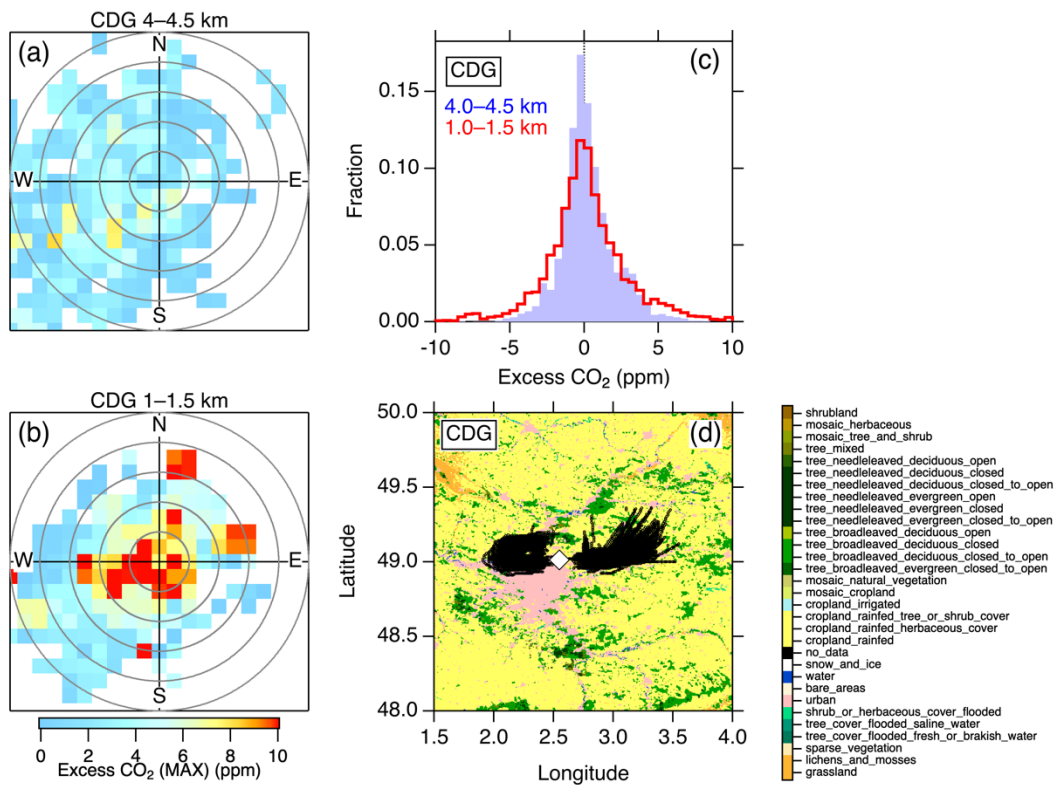

Supplementary Figure S6. Same as Fig. 1, but for Paris Charles de Gaulle Airport (CDG).

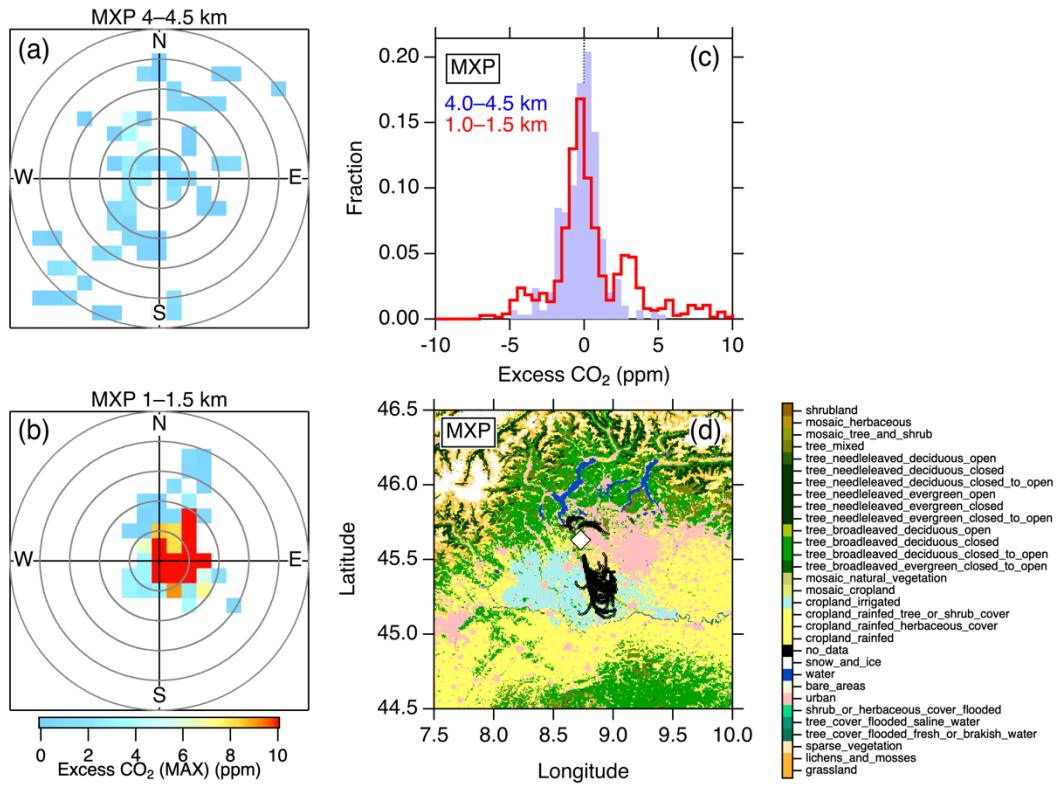

**Supplementary Figure S7. Same as Fig. 1, but for Milano Malpensa Airport (MXP).**

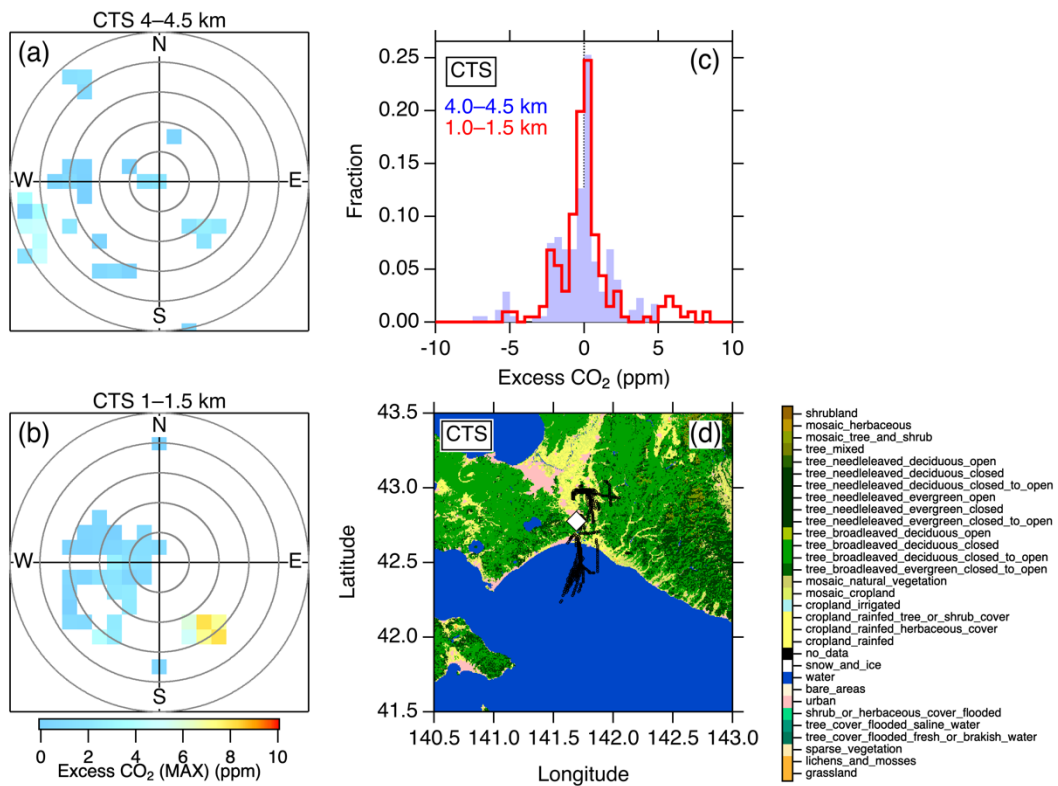

**Supplementary Figure S8. Same as Fig. 1, but for New Chitose Airport (CTS).**

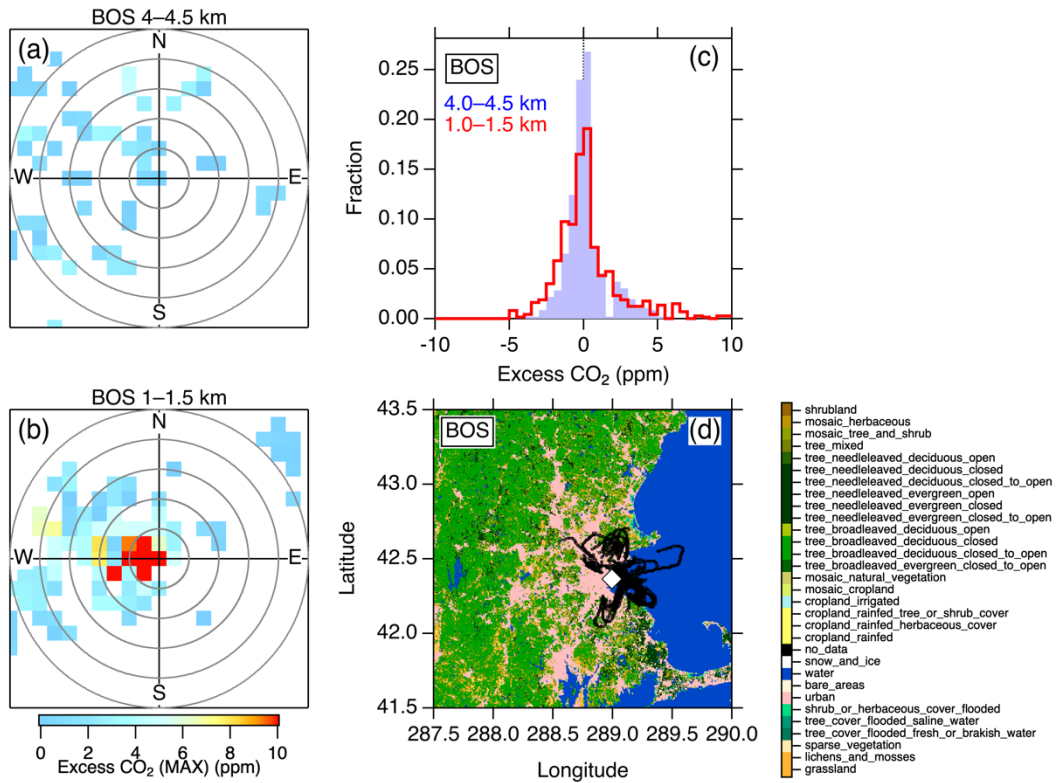

**Supplementary Figure S9. Same as Fig. 1, but for Boston Logan International Airport (BOS).**

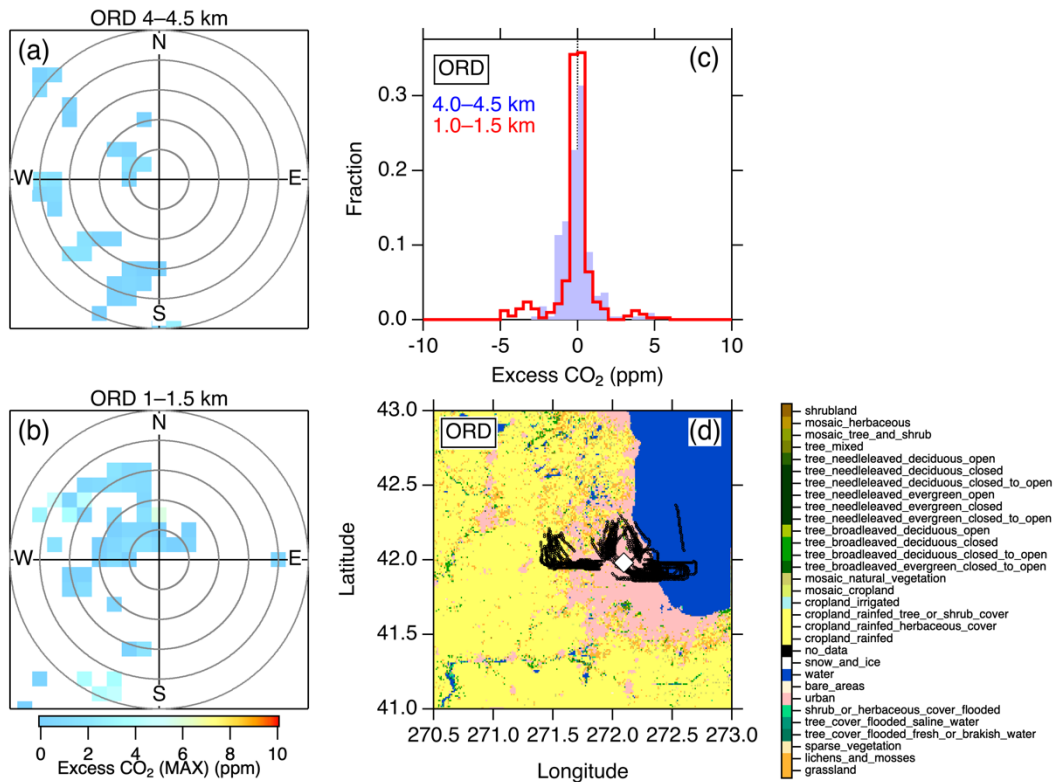

**Supplementary Figure S10. Same as Fig. 1, but for Chicago O'Hare International Airport (ORD).**

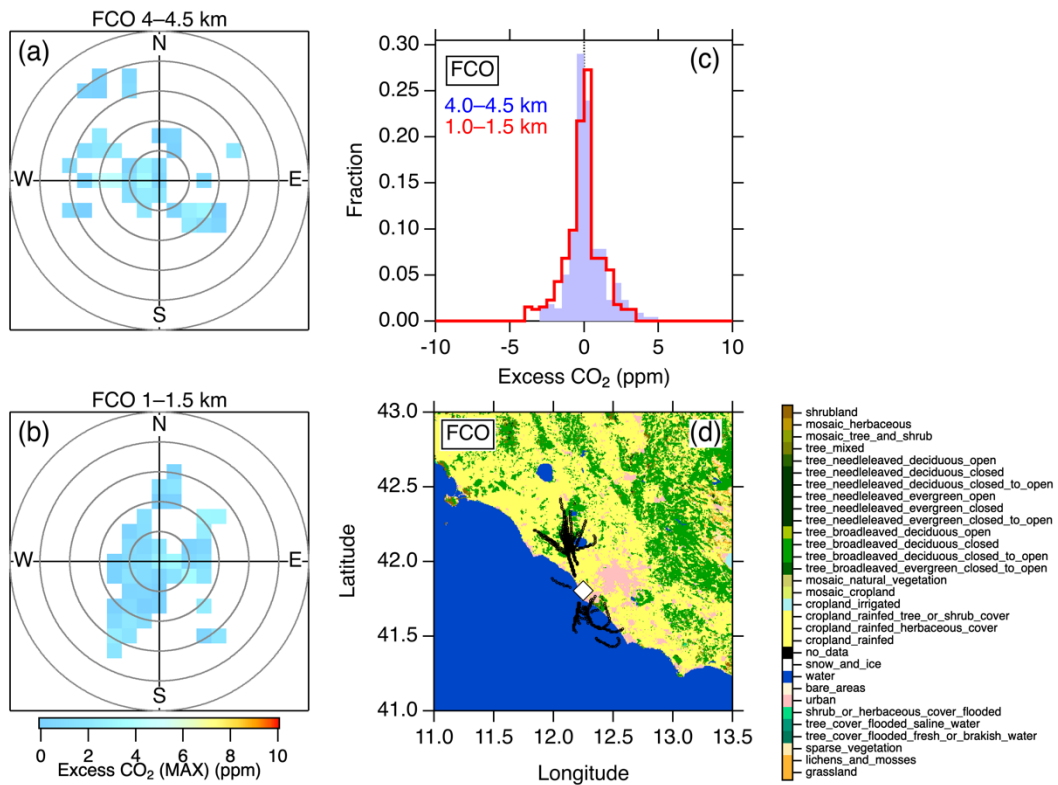

**Supplementary Figure S11. Same as Fig. 1, but for Rome–Fiumicino International Airport (FCO).**

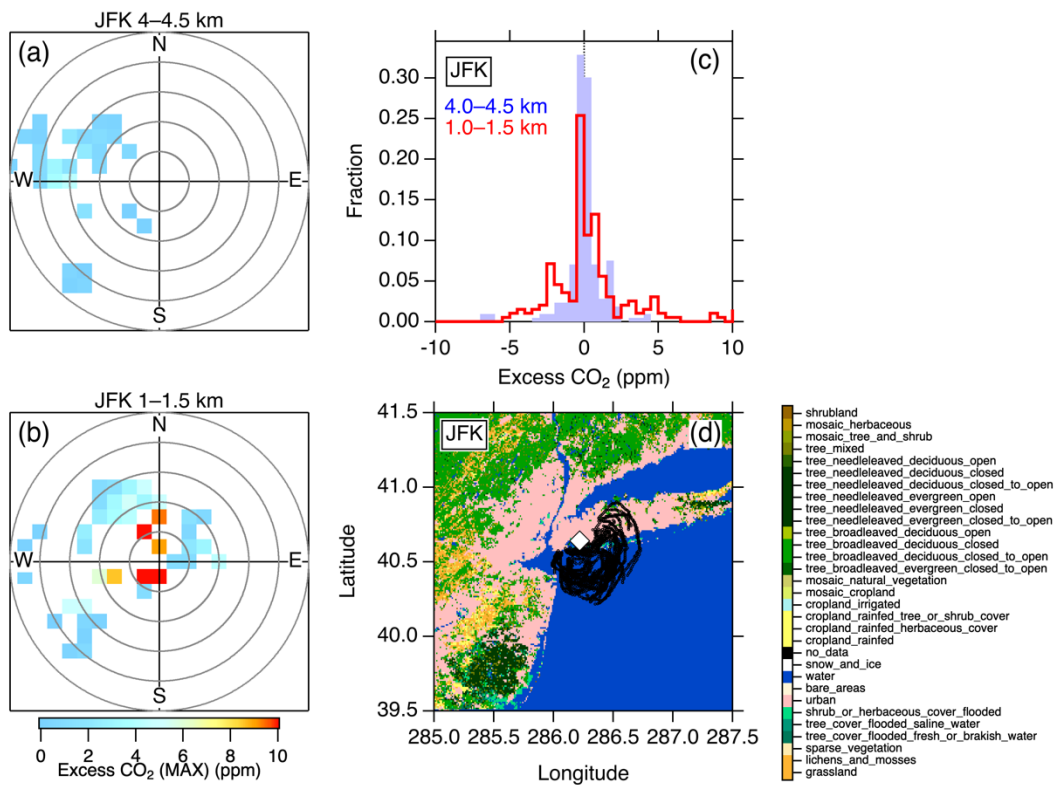

**Supplementary Figure S12. Same as Fig. 1, but for John F. Kennedy International Airport (JFK).**



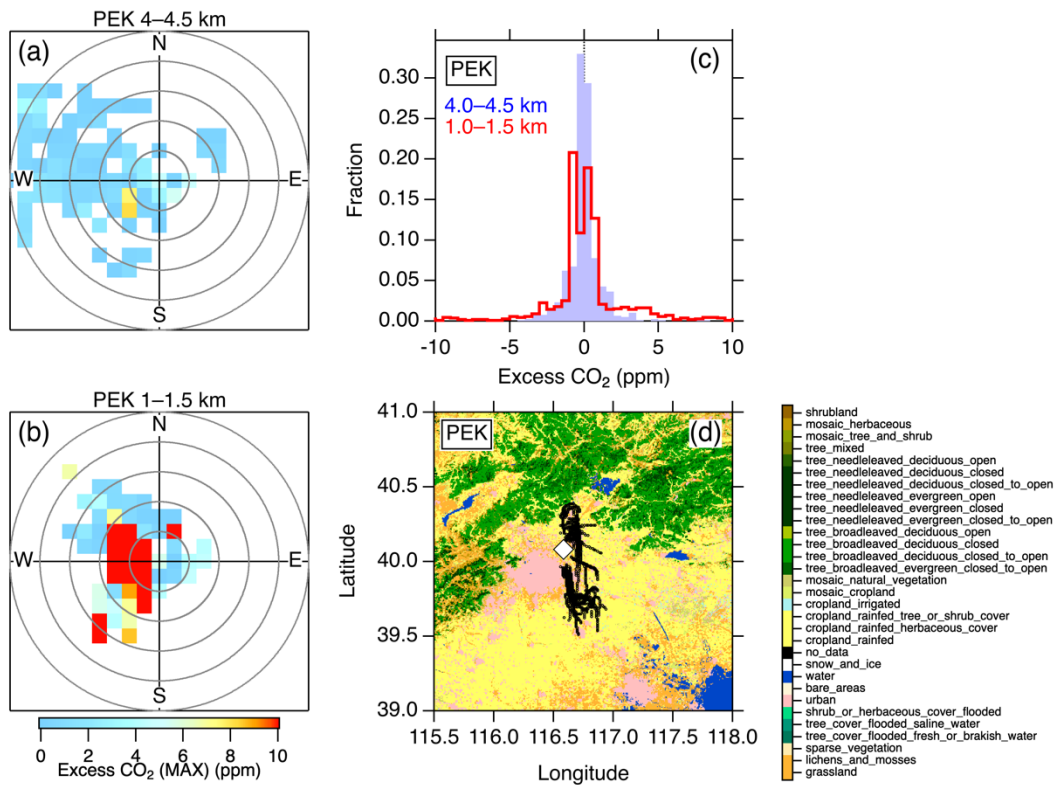

**Supplementary Figure S13. Same as Fig. 1, but for Beijing Capital International Airport (PEK).**

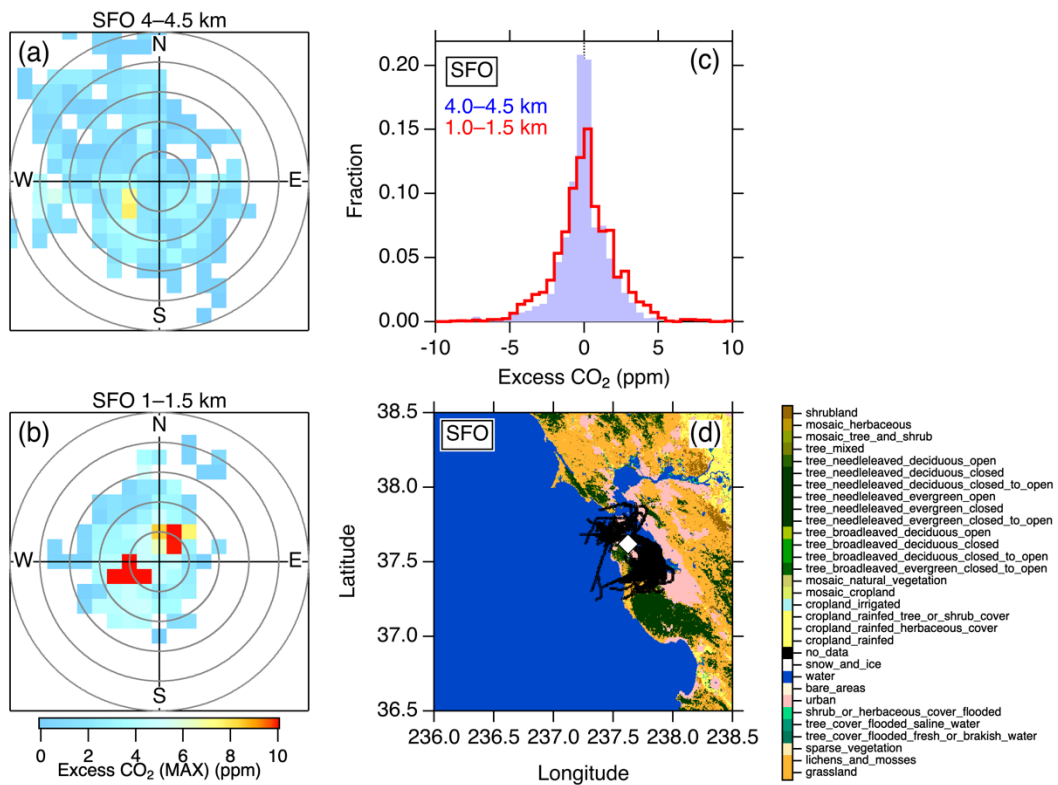

**Supplementary Figure S14. Same as Fig. 1, but for San Francisco International Airport (SFO).**

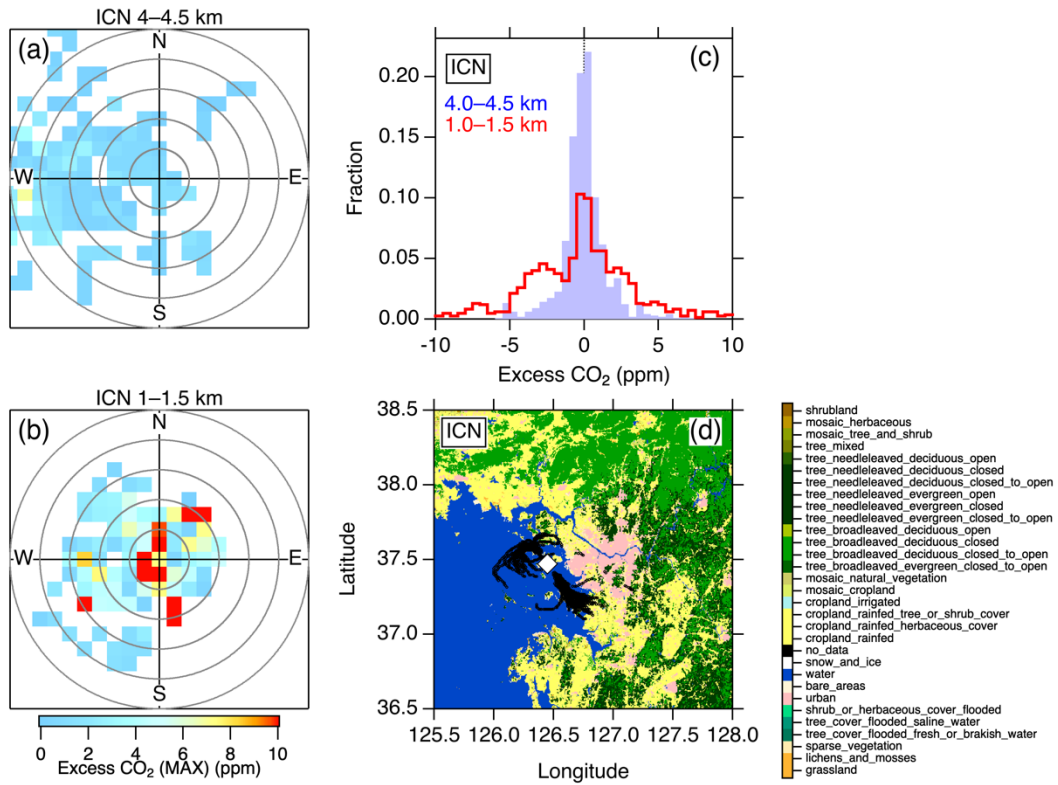

**Supplementary Figure S15. Same as Fig. 1, but for Incheon International Airport (ICN).**

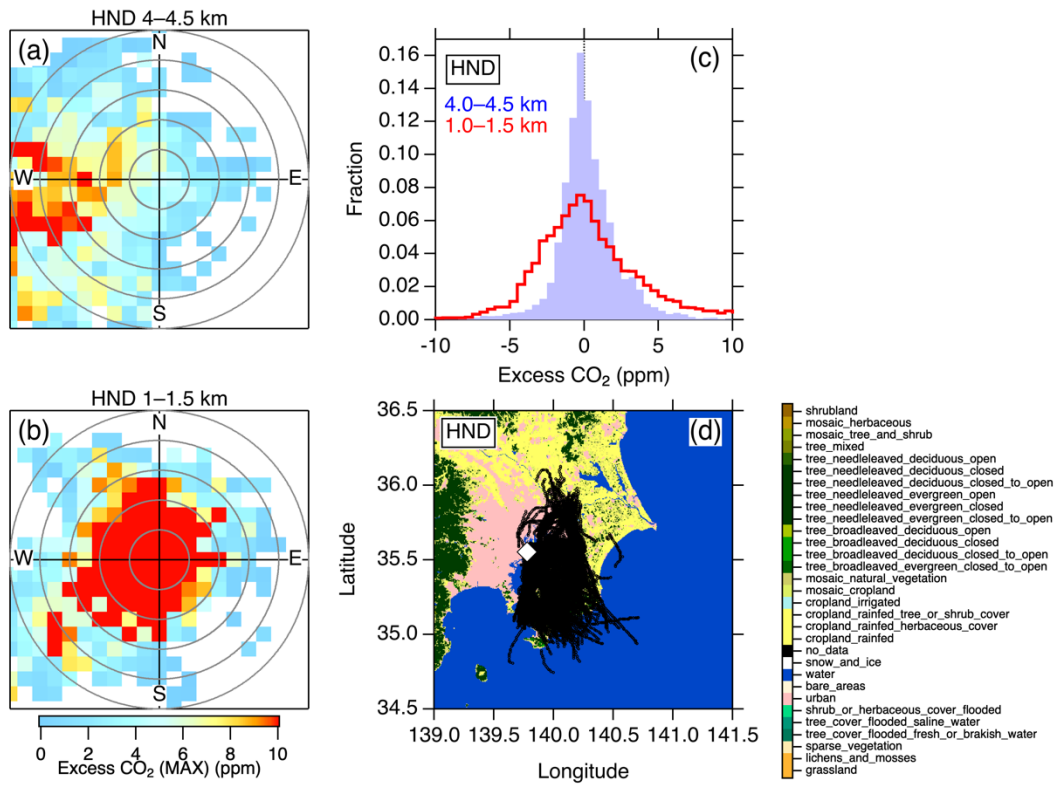

**Supplementary Figure S16. Same as Fig. 1, but for Tokyo International Airport (HND).**

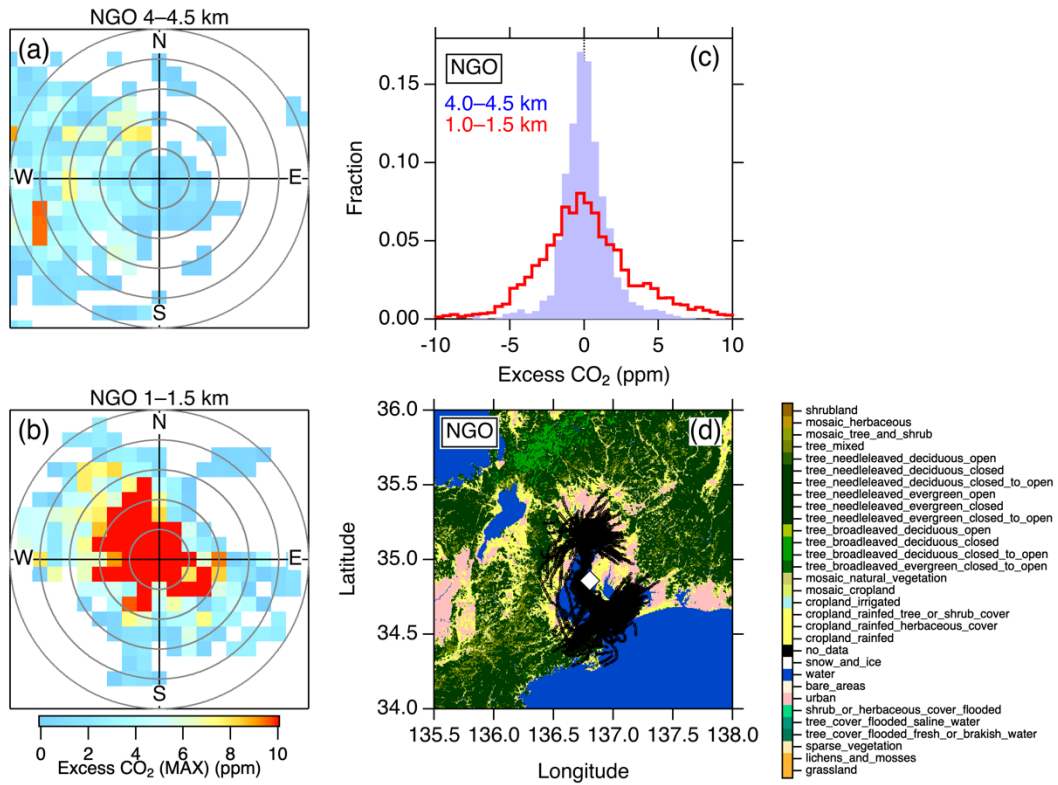

Supplementary Figure S17. Same as Fig. 1, but for Chubu Centrair International Airport (NGO).

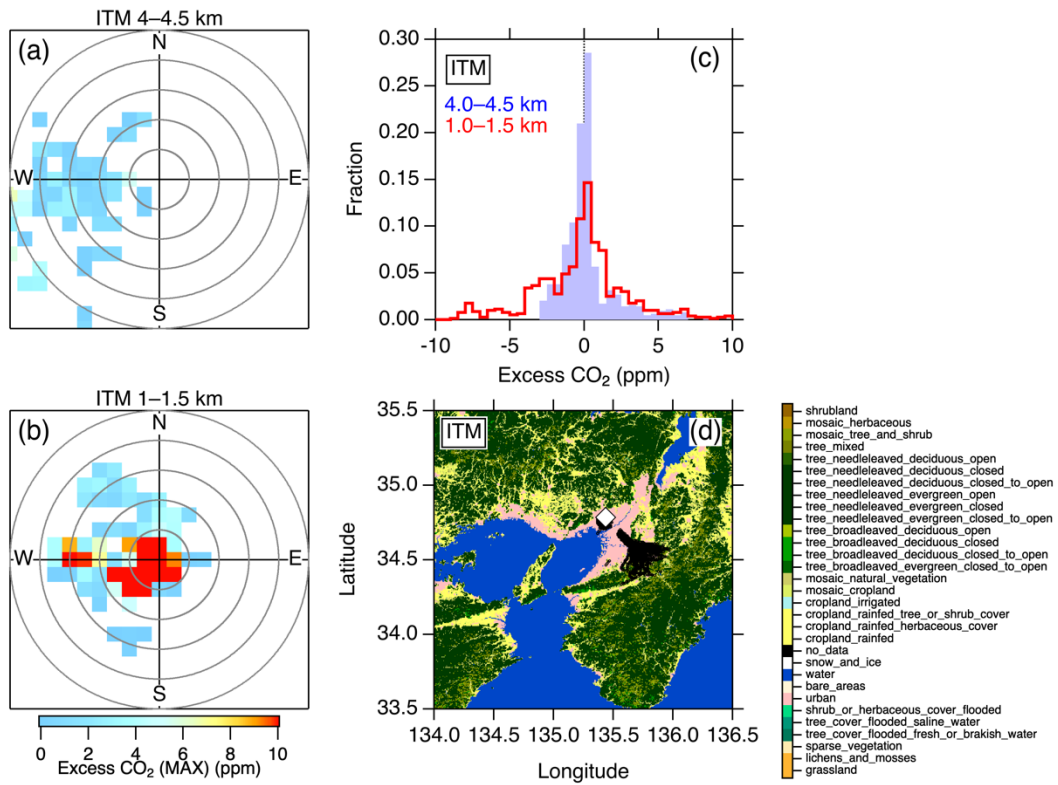

Supplementary Figure S18. Same as Fig. 1, but for Osaka International Airport (ITM).

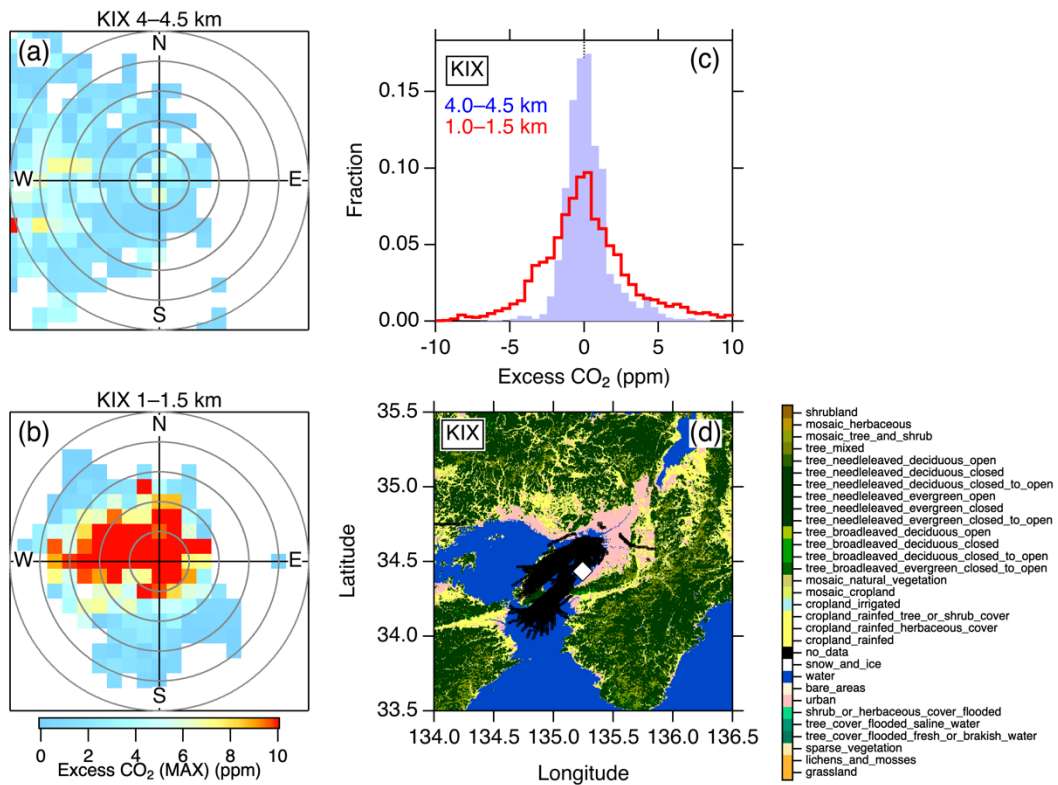

Supplementary Figure S19. Same as Fig. 1, but for Kansai International Airport (KIX).

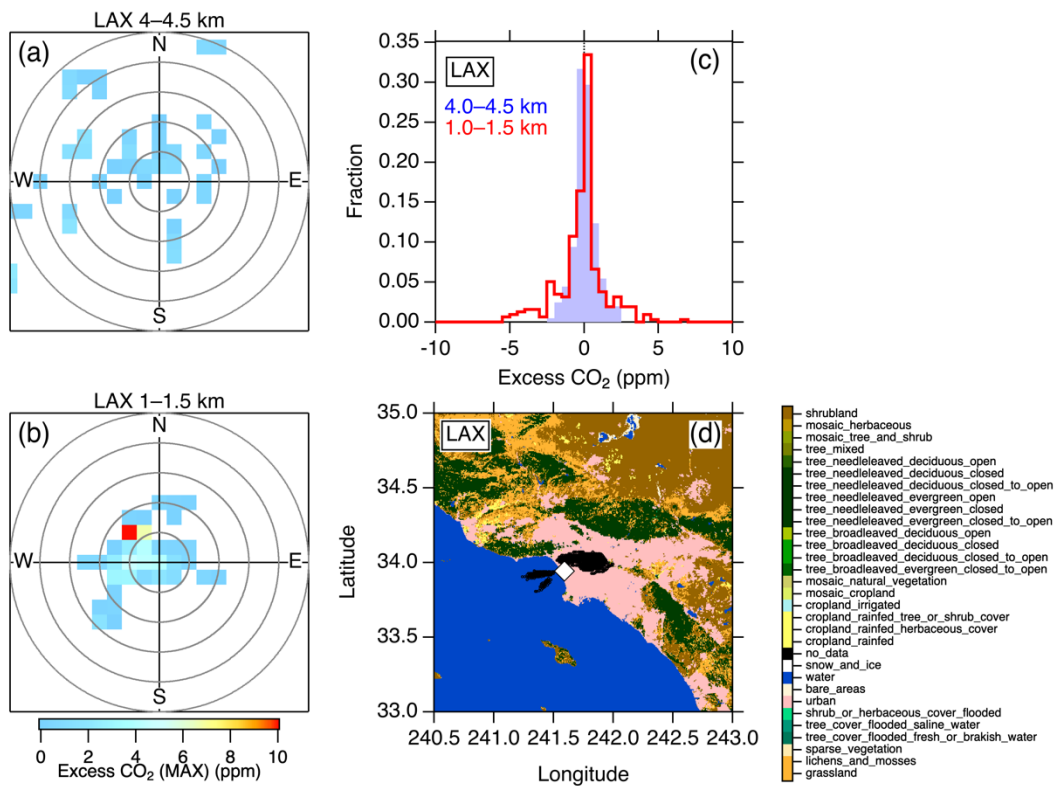

Supplementary Figure S20. Same as Fig. 1, but for Los Angeles International Airport (LAX).

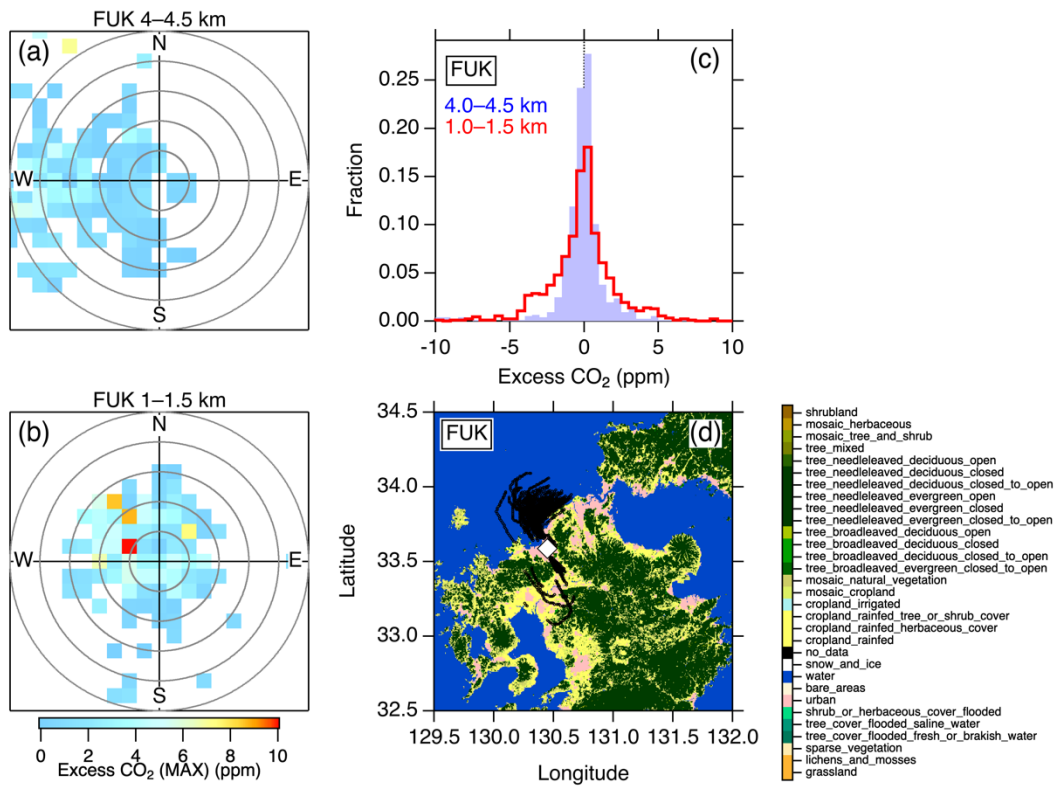

**Supplementary Figure S21. Same as Fig. 1, but for Fukuoka Airport (FUK).**

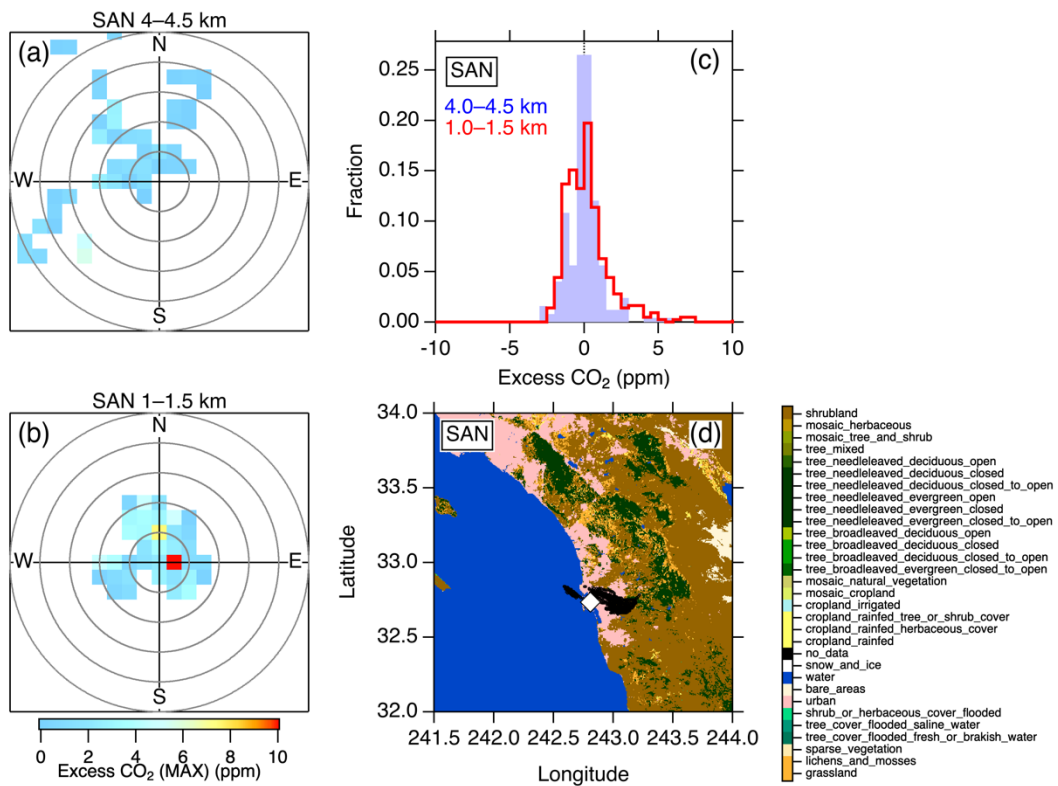

**Supplementary Figure S22. Same as Fig. 1, but for San Diego International Airport (SAN).**

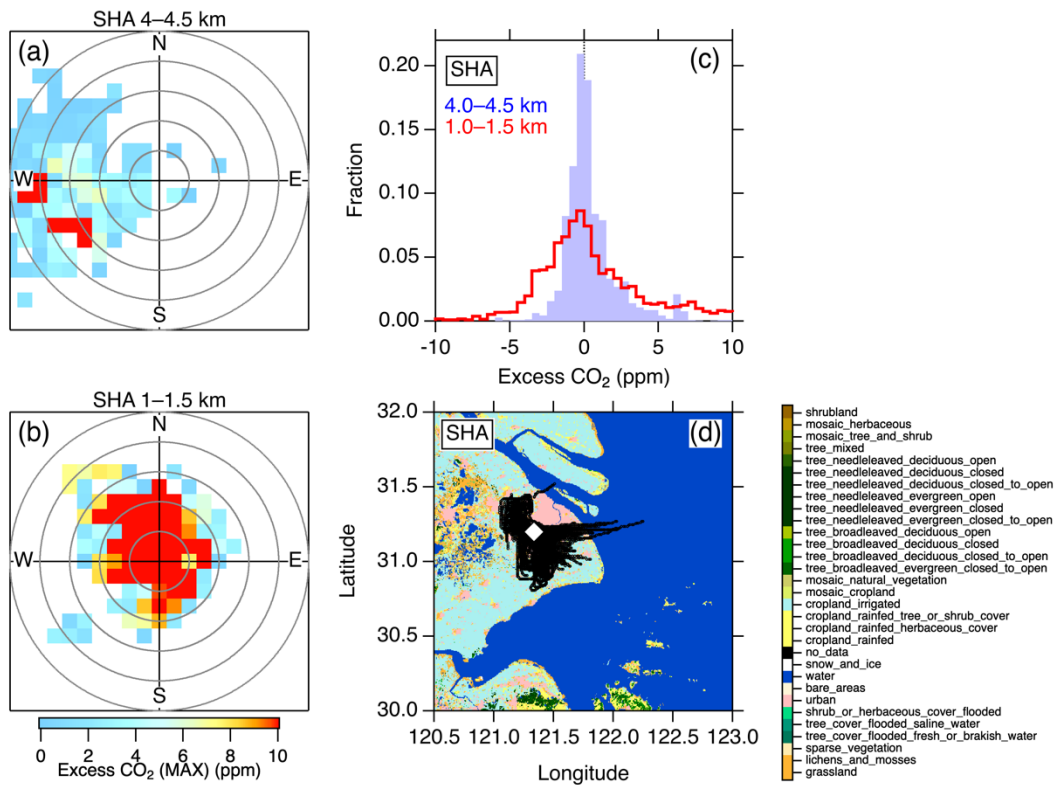

**Supplementary Figure S23. Same as Fig. 1, but for Shanghai Hongqiao International Airport (SHA).**

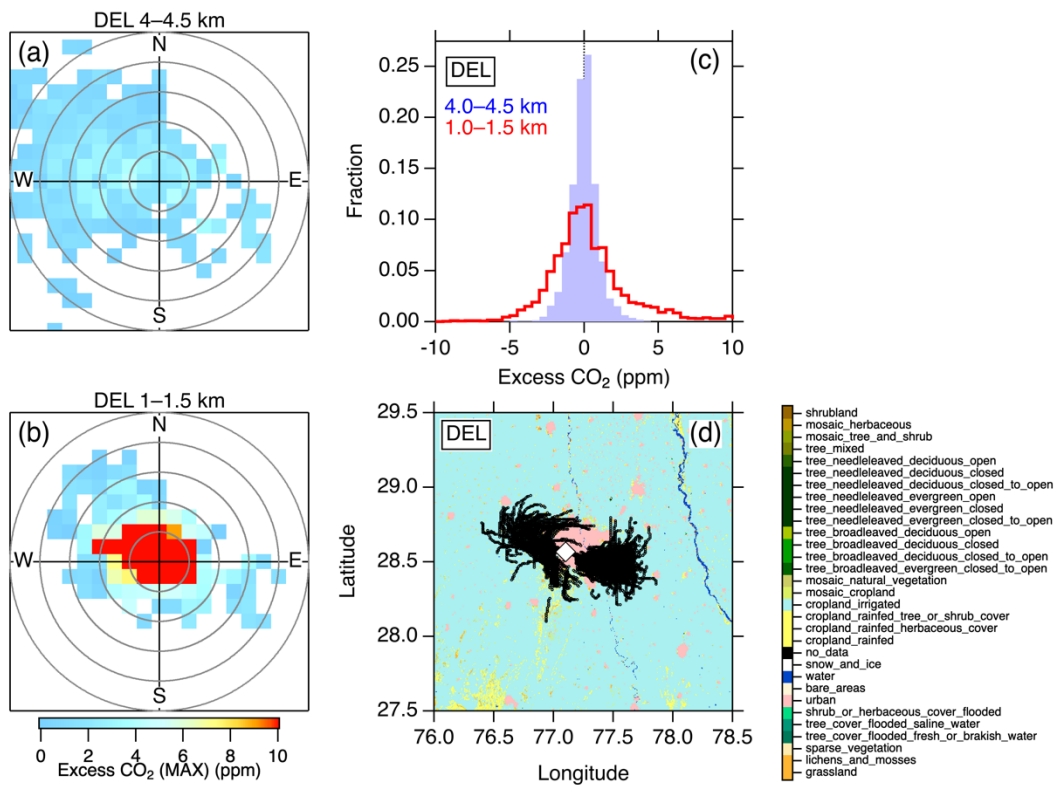

**Supplementary Figure S24. Same as Fig. 1, but for Indira Gandhi International Airport (DEL).**

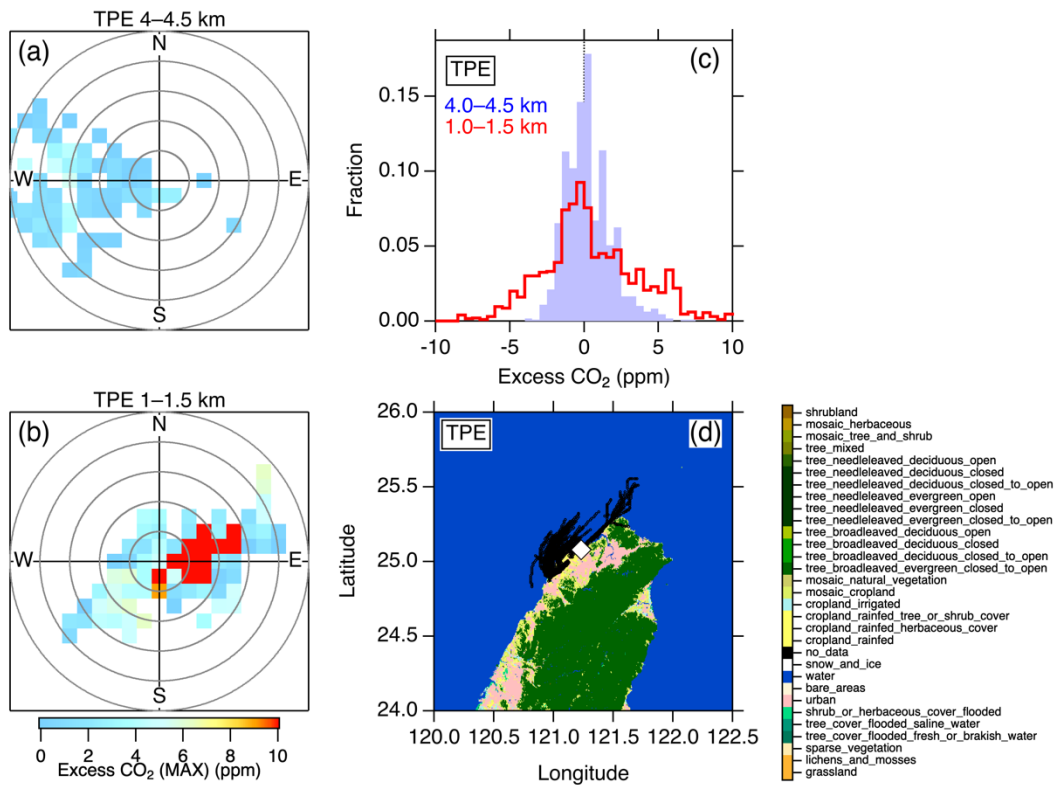

**Supplementary Figure S25. Same as Fig. 1, but for Taiwan Taoyuan International Airport (TPE).**

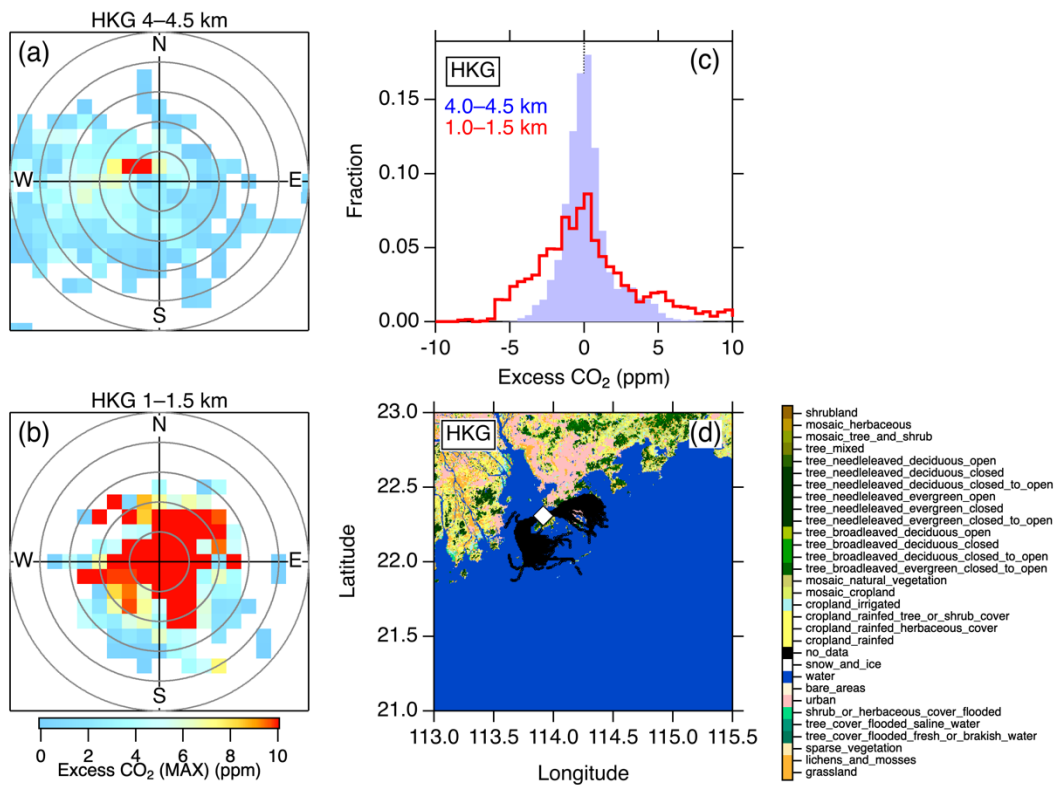

**Supplementary Figure S26. Same as Fig. 1, but for Hong Kong International Airport (HKG).**

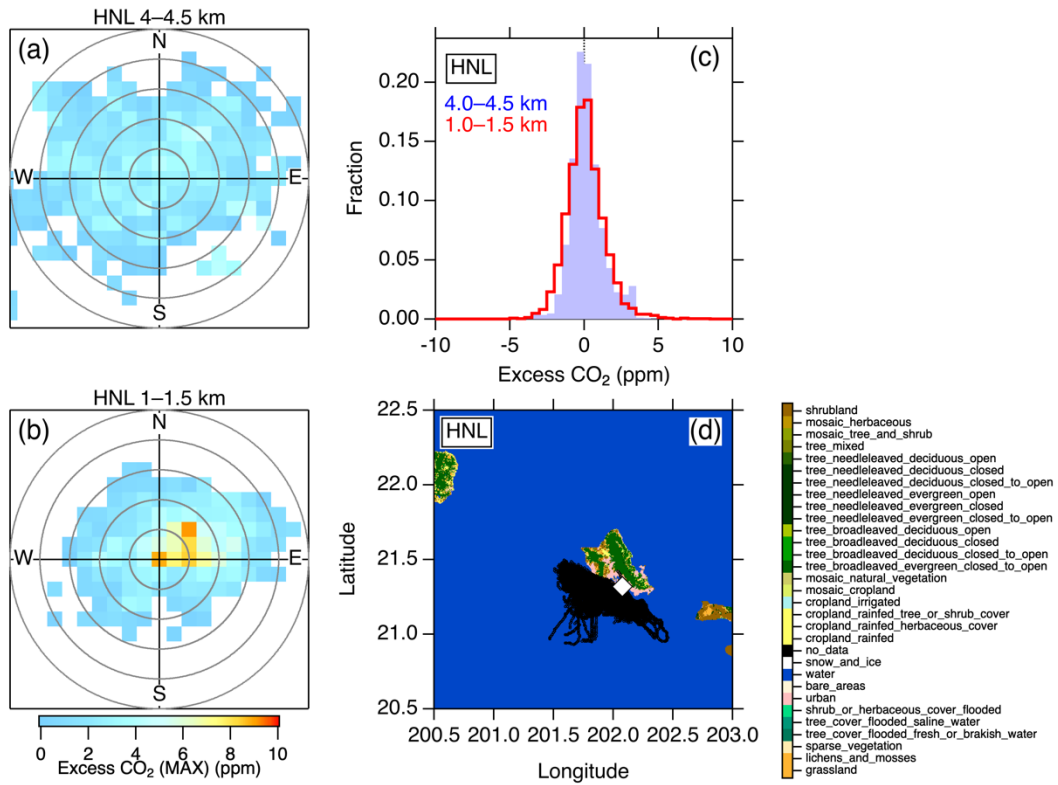

**Supplementary Figure S27. Same as Fig. 1, but for Daniel K. Inouye International Airport (HNL).**

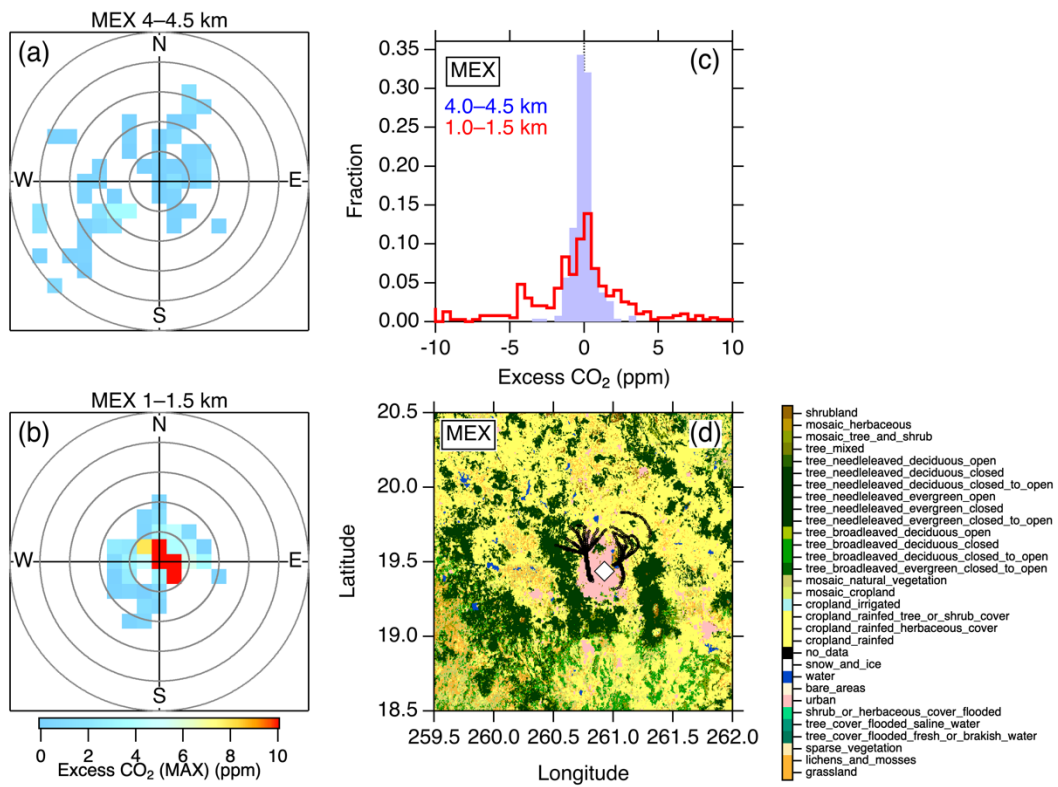

**Supplementary Figure S28. Same as Fig. 1, but for Mexico City International Airport (MEX).**



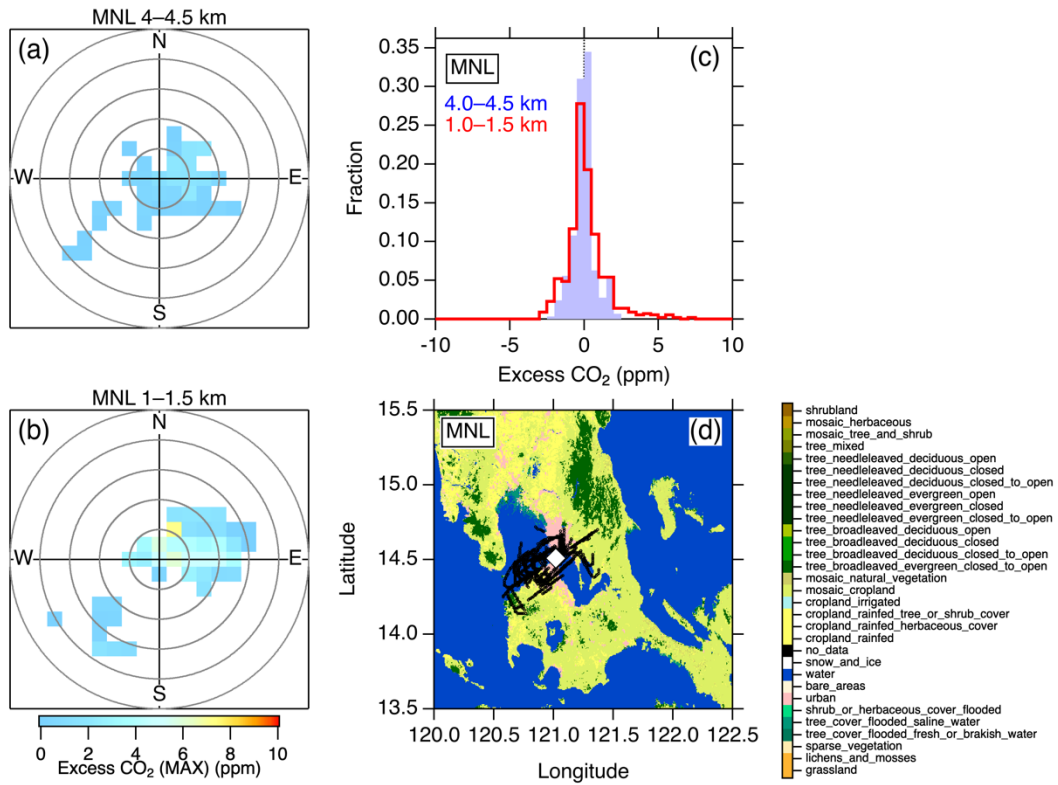

Supplementary Figure S29. Same as Fig. 1, but for Ninoy Aquino International Airport (MNL).

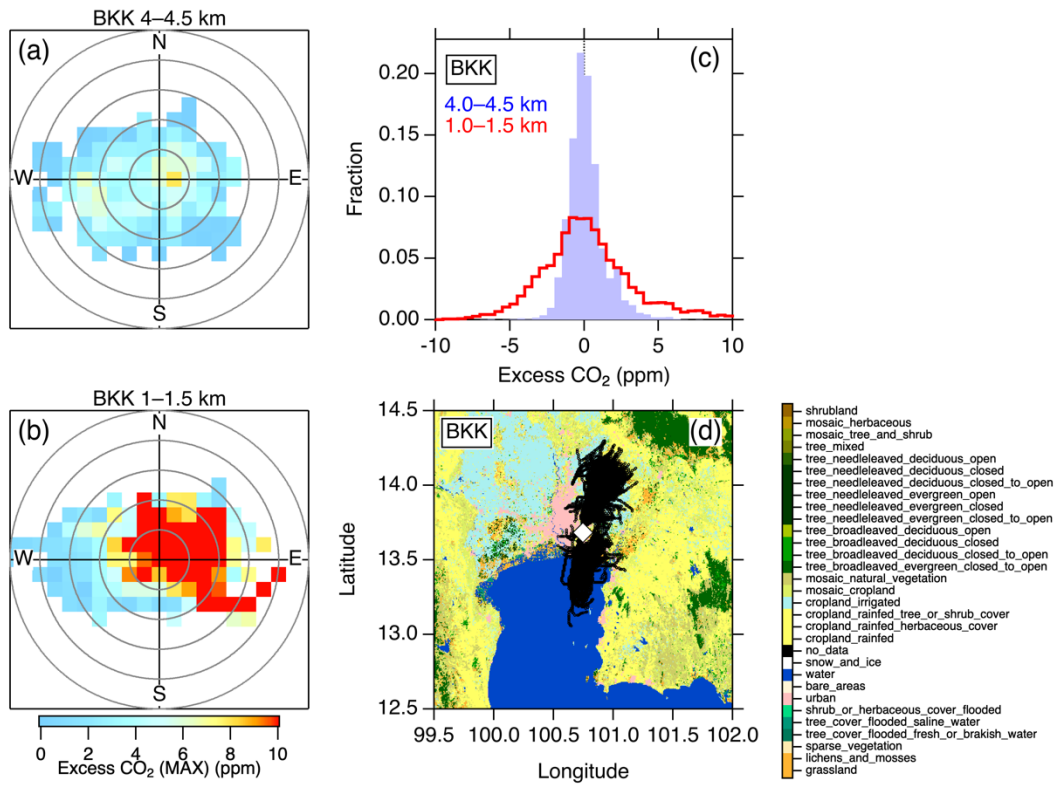

Supplementary Figure S30. Same as Fig. 1, but for Suvarnabhumi Airport (BKK).

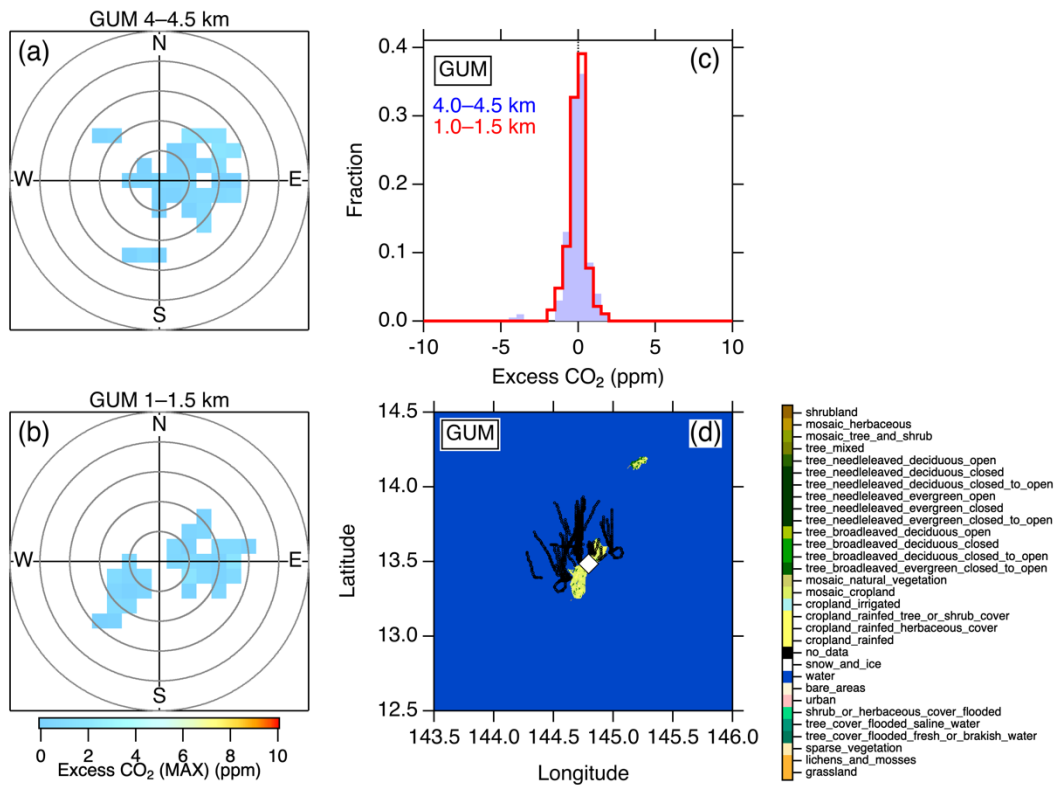

Supplementary Figure S31. Same as Fig. 1, but for Antonio B. Won Pat International Airport (GUM).

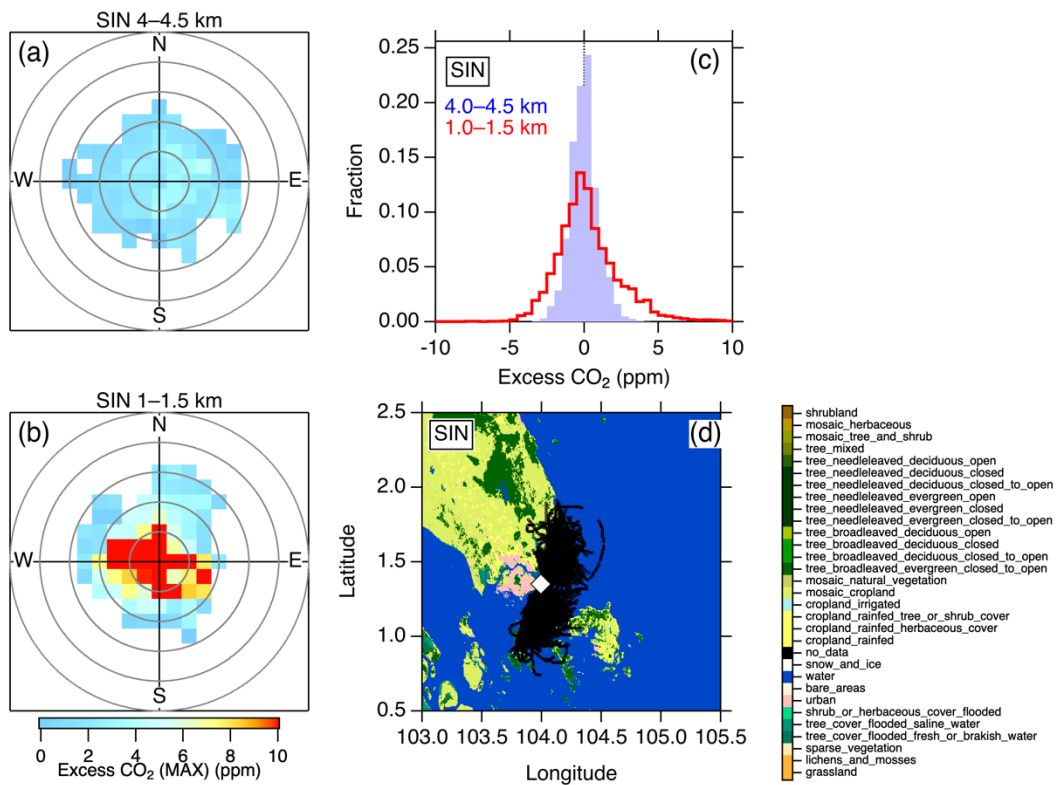

Supplementary Figure S32. Same as Fig. 1, but for Singapore Changi Airport (SIN).

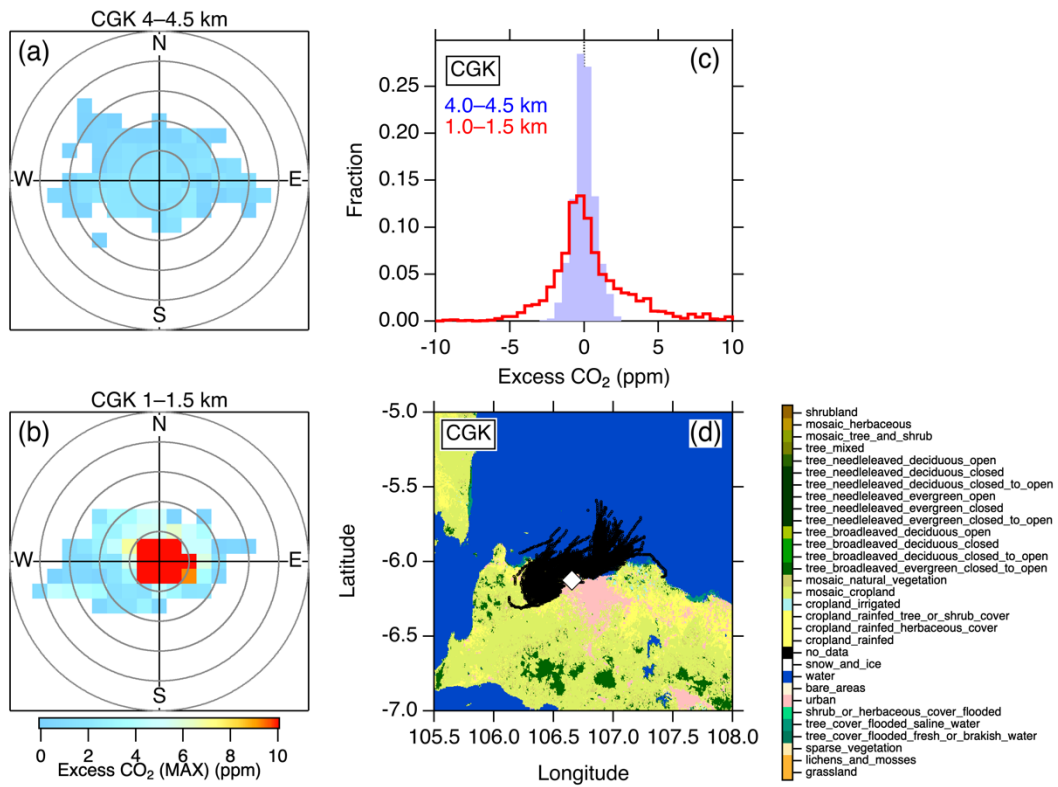

**Supplementary Figure S33. Same as Fig. 1, but for Soekarno–Hatta International Airport (CGK).**

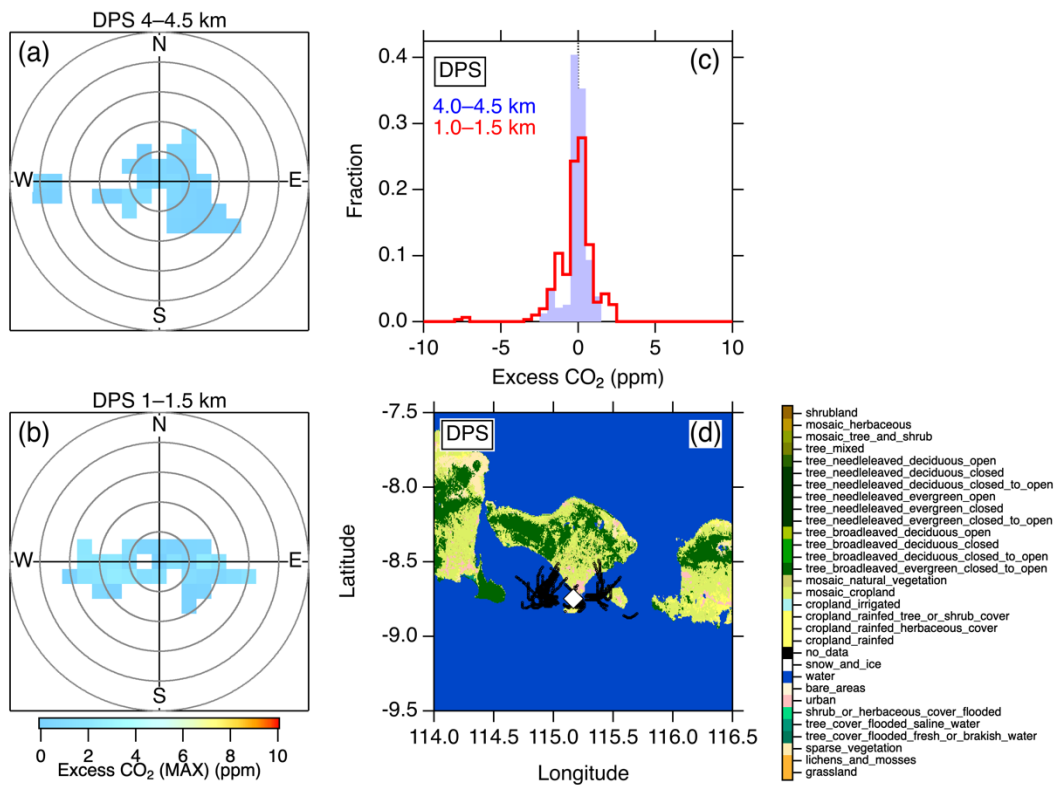

**Supplementary Figure S34. Same as Fig. 1, but for I Gusti Ngurah Rai International Airport (DPS).**

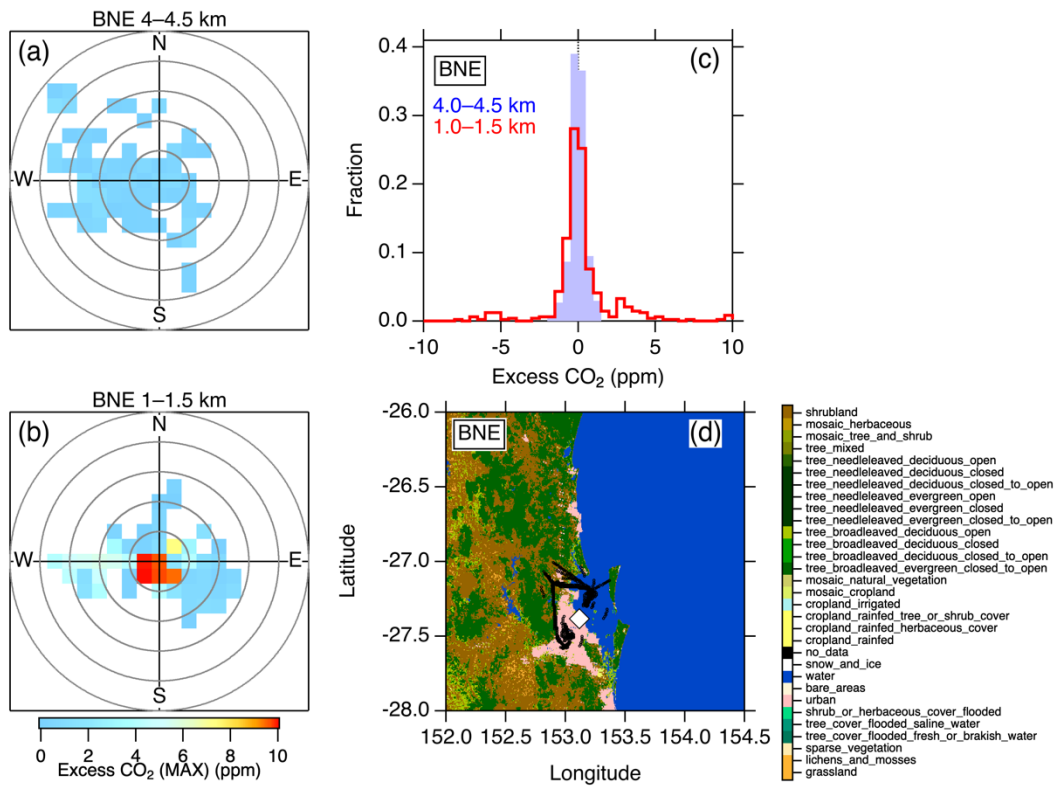

**Supplementary Figure S35. Same as Fig. 1, but for Brisbane Airport (BNE).**

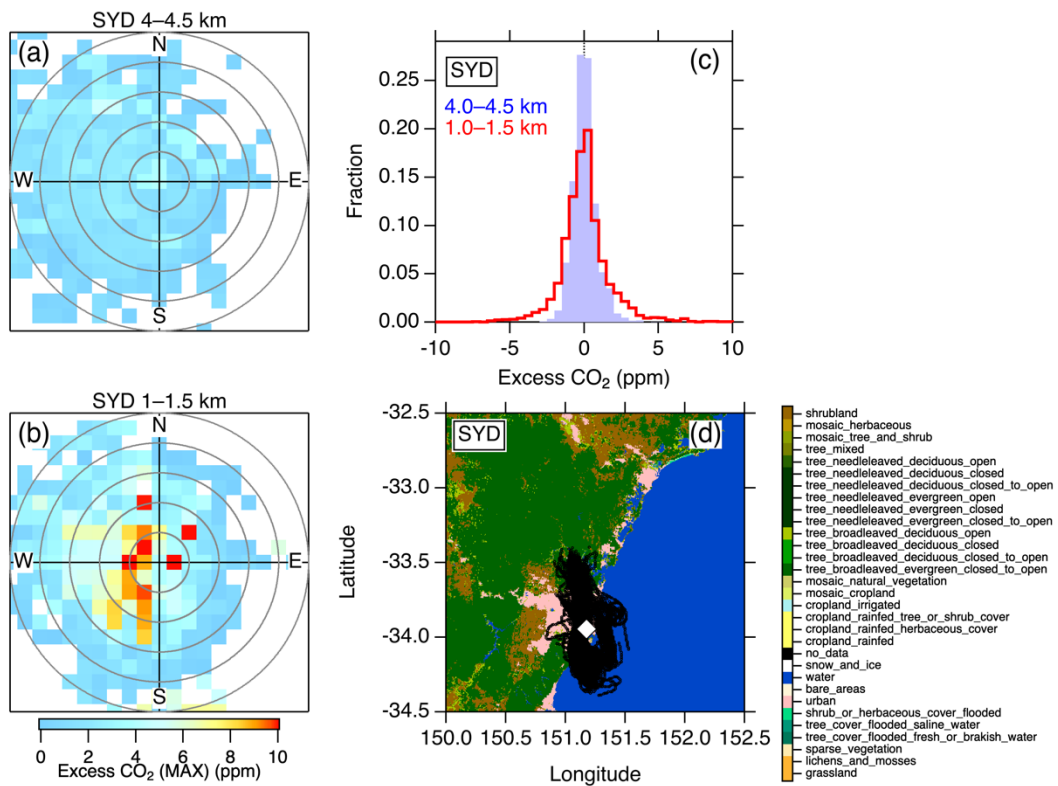

**Supplementary Figure S36. Same as Fig. 1, but for Sydney (Kingsford Smith) Airport (SYD).**

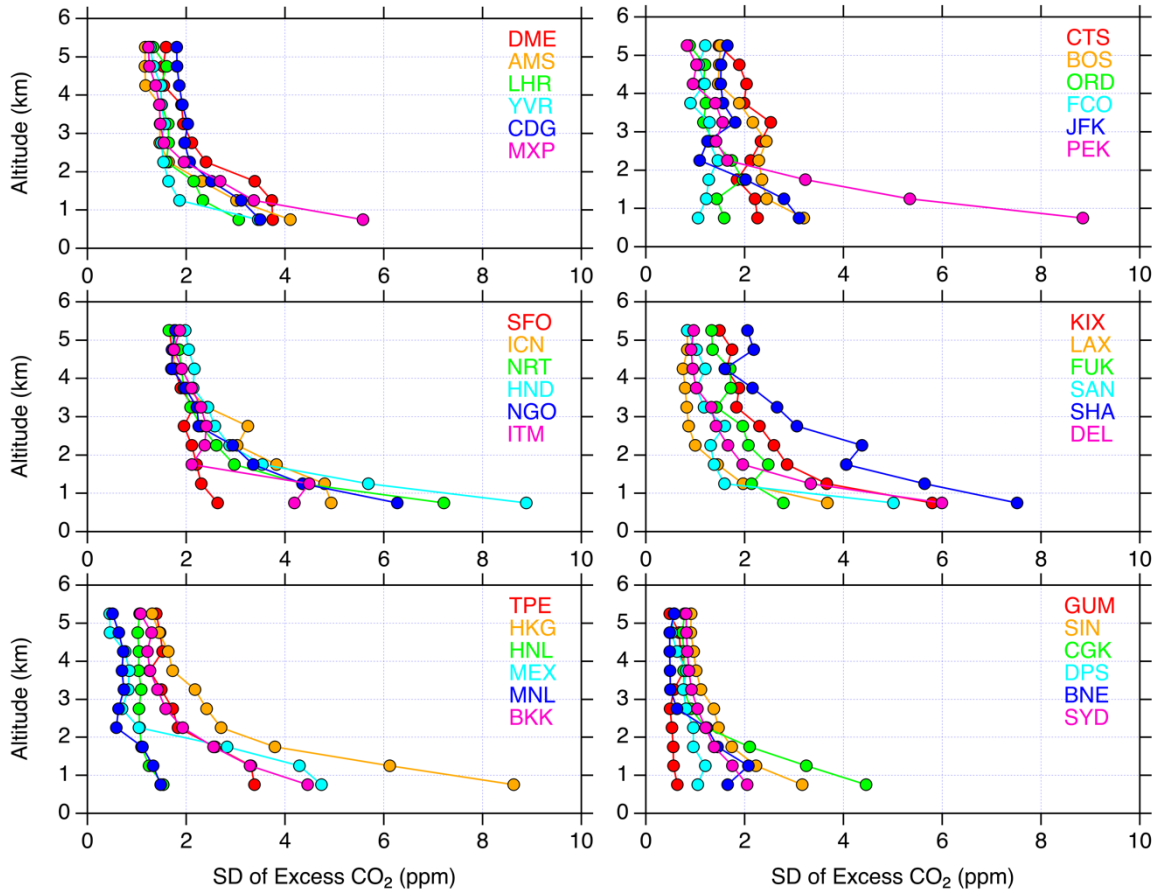

**Supplementary Figure S37. Vertical profiles of standard deviations of excess CO<sub>2</sub> at the 36 airports.**
